# Supplementary material
Source: Elsevier journal article supplement (https://comptes-rendus.academie-sciences.fr/biologies/article/10.1016/j.crvi.2016.09.005/file/attach/mmc4.pdf)
Supplement: mmc4 [file mmc4.pdf]

## Appendix D. Species richness map of the family Pteropodidae

The species richness map was constructed using the 180 species mapped by the IUCN (2015) and following the method described in Marin and Hedges (2016).

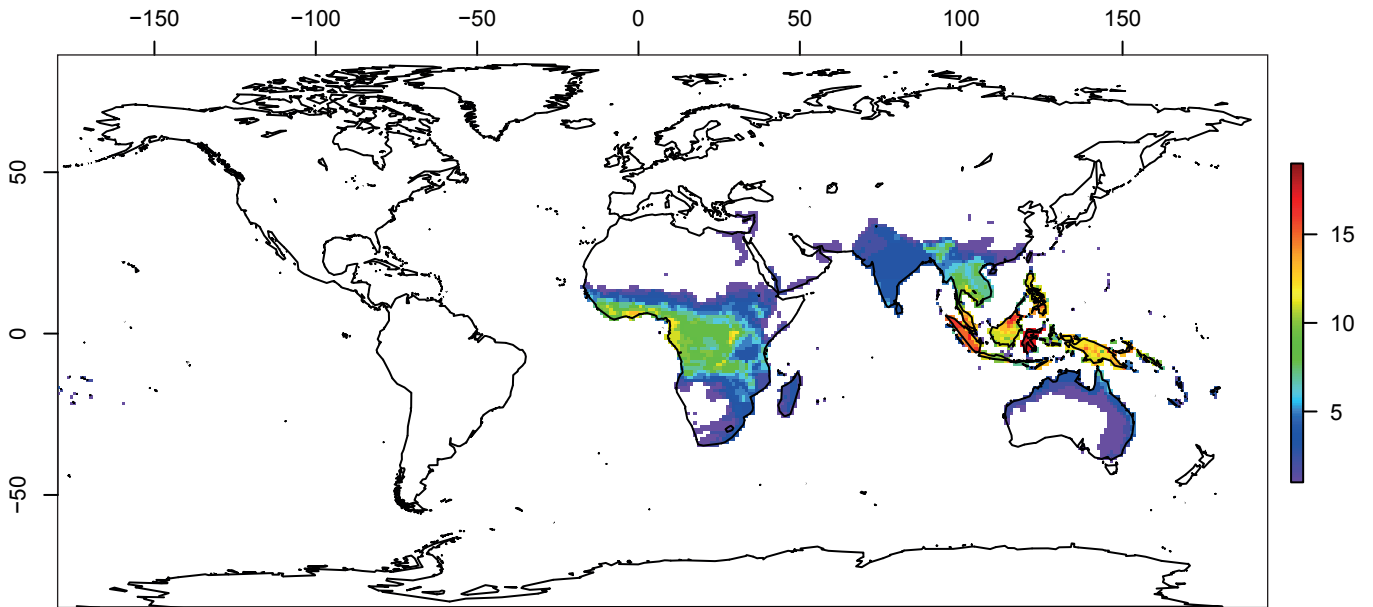

### Reference

Marin J, Hedges SB (2016) Time best explains global variation in species richness of amphibians, birds and mammals. *Journal of Biogeography* 43: 1069-1079.
